# Supplementary material for: Tumor-Suppressor Role of the α1-Na/K-ATPase Signalosome in NASH Related Hepatocellular Carcinoma
Source: MDPI journal article supplement (doi:10.3390/ijms23137359), 2022-07-01
Supplement: s1 [file s1]

Supplementary Material

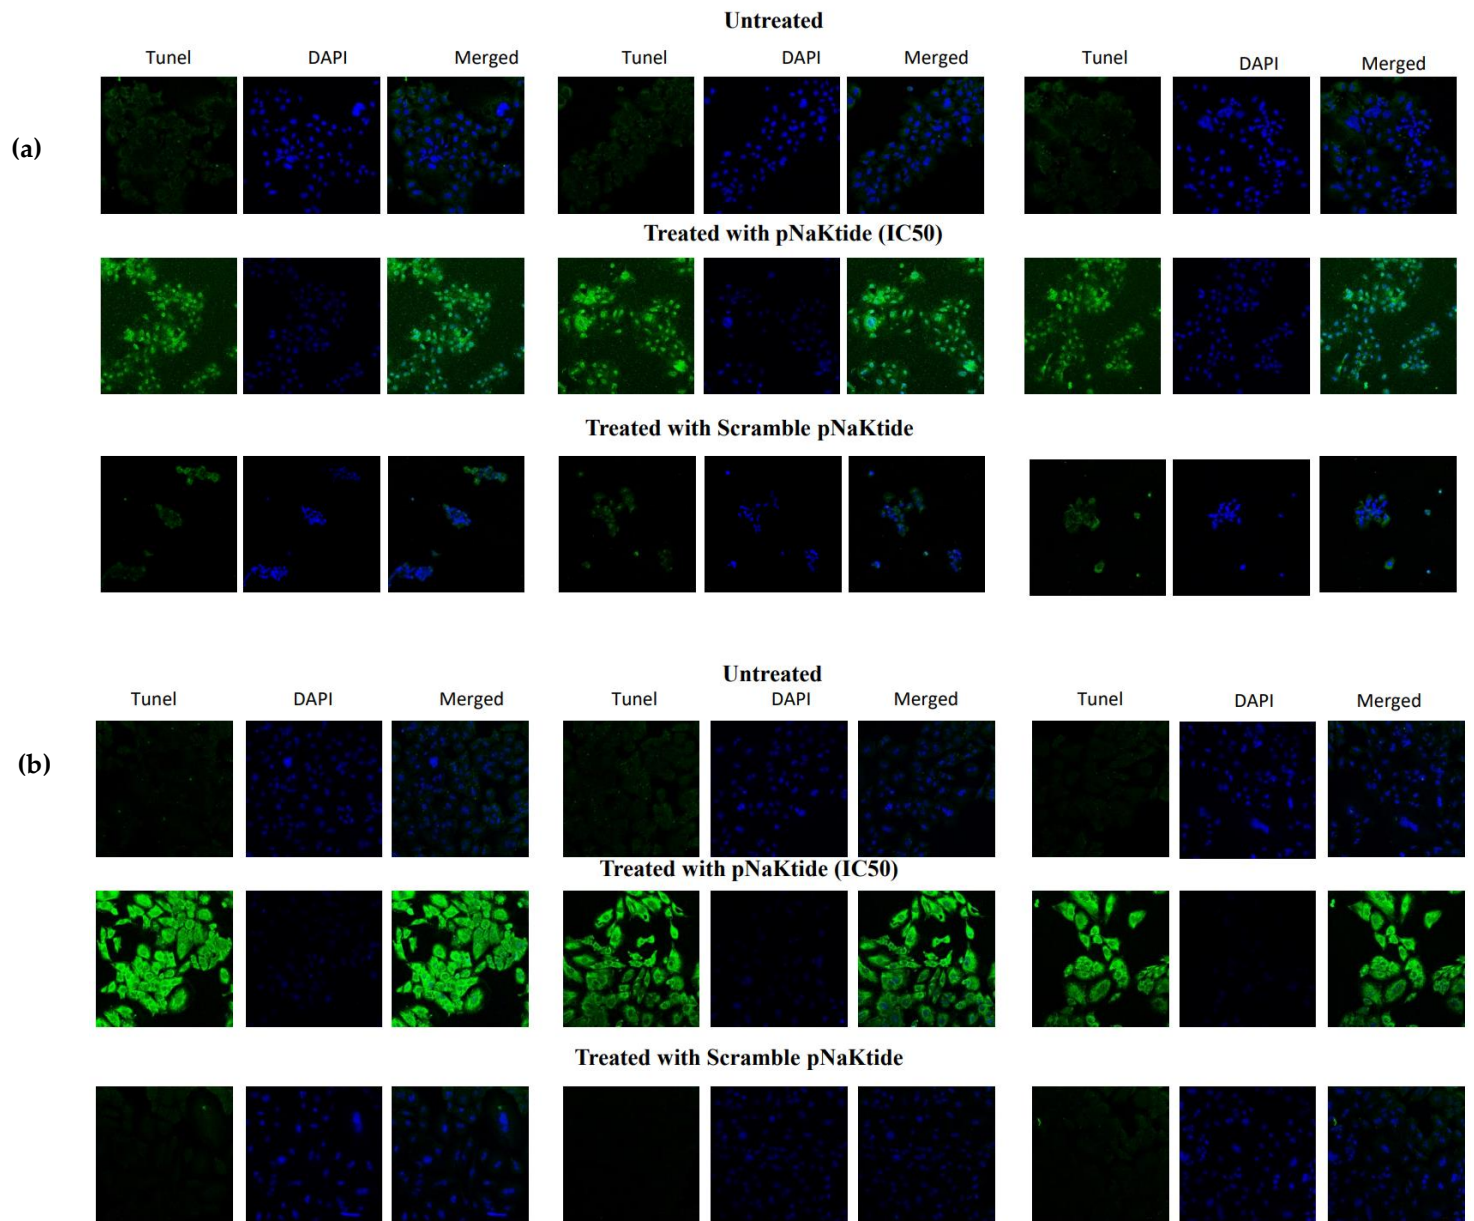

**Figure S1.** (a) Confocal images of pNaKtide induced apoptosis in Hep3B cell lines with Scramble pNaKtide as controls. (b) Confocal images of pNaKtide induced apoptosis in SNU475 cell lines with Scramble pNaKtide as controls. Magnification  $\times 20$ .

(a)

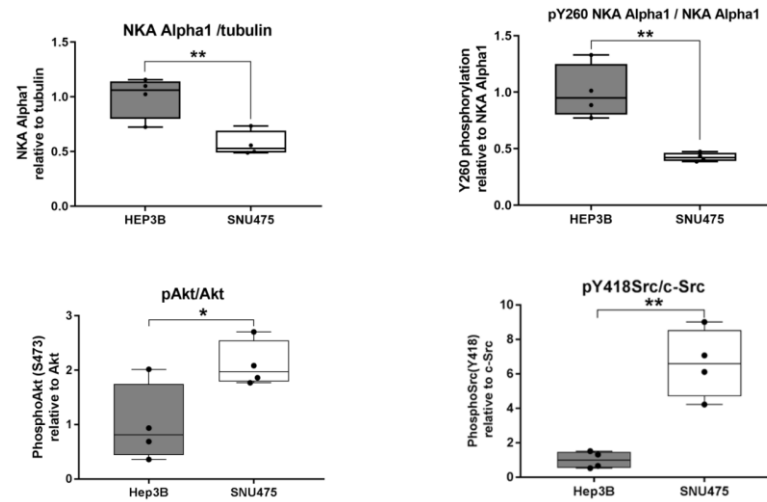

(b)

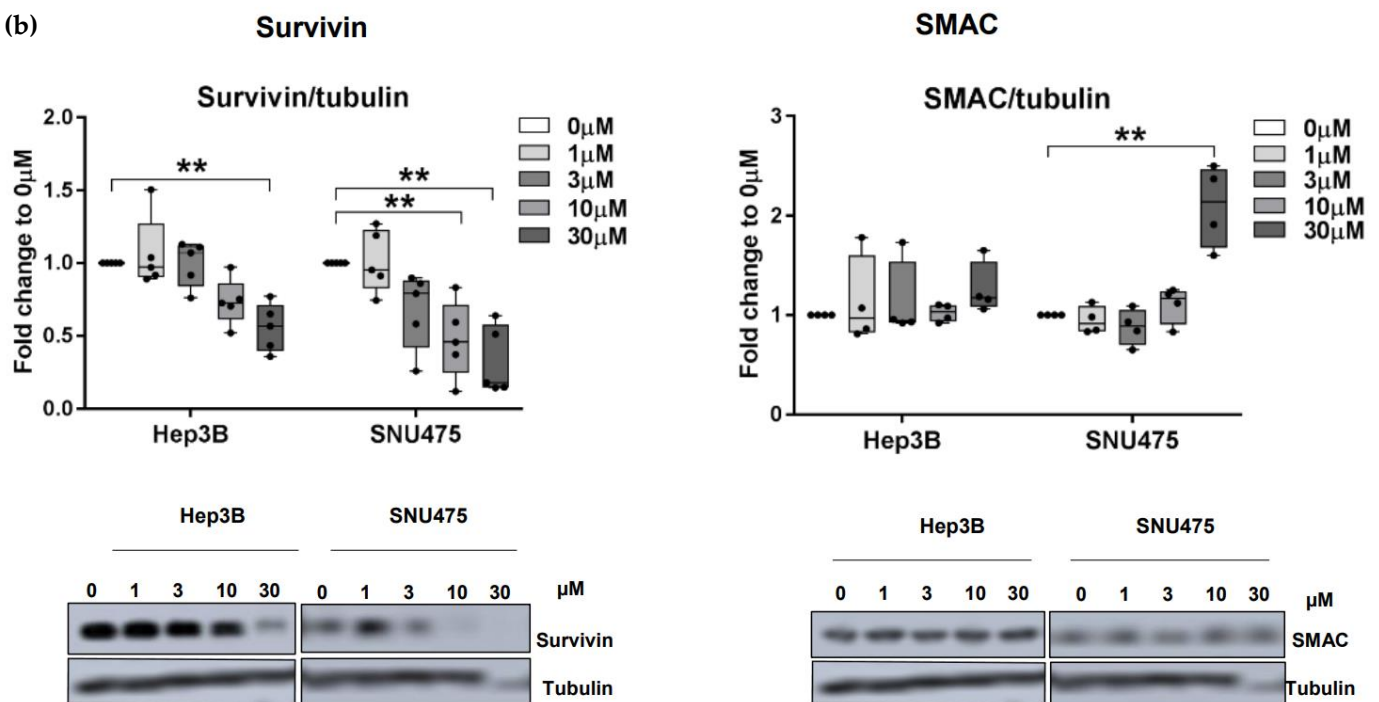

**Figure S2.** (a) Basal expression of  $\alpha 1$ -NKA, *pSrc*, *pAkt* and *pY260* in Hep3B and SNU475 cell lines. Baseline  $\alpha 1$ -NKA and *pY260* expression was lower in SNU475 cell line than Hep3B cell line. On the contrary, there was a high baseline Src and Akt phosphorylation in SNU475 cell line than Hep3B cell line ( $n = 4$ ,  $**p < 0.01$  by ANOVA and Turkey's Post hoc test). (b) *Survivin* and *SMAC* dose-response to pNaKtide treatment in two HCC cell lines. There was a progressive downregulation of survivin with concomitant SMAC protein upregulation in both human HCC cell lines following increased pNaKtide administration, with upregulation of SMAC expression especially at the highest pNaKtide dose. Dose-response on targeted protein expression, survivin & SMAC in Hep3B and SNU475 cell lines exposed to pNaKtide (0, 1, 3, 10 and 30  $\mu$ M) up to 18 hours. Results are shown as box-whisker plots showing a fold change in each protein relative to 0  $\mu$ M. ( $n = 4-5$  for each group,  $**p < 0.01$  by ANOVA and Turkey's Post hoc test).

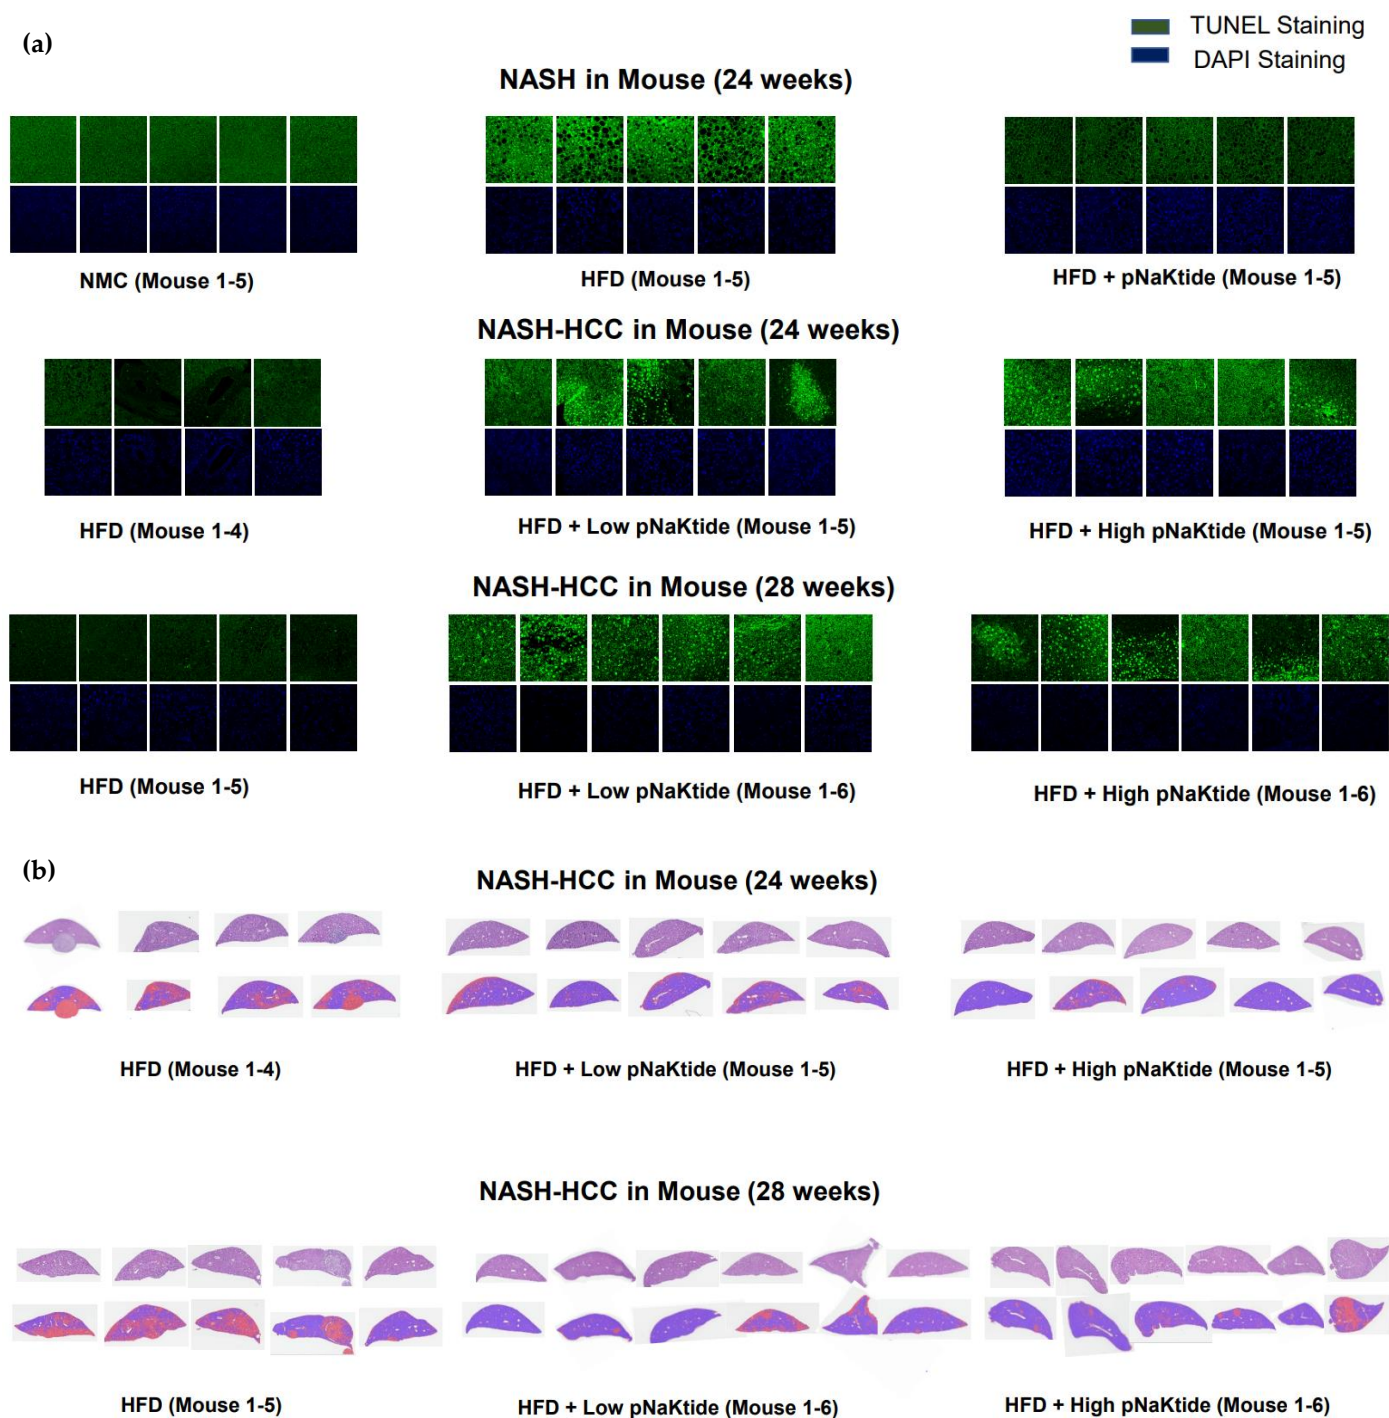

**Figure S3.** In vivo evaluation of  $\alpha 1$ -NKA Signalosome normalization on NASH and NASH related HCC at 24 (early) and 28 weeks (advanced) models. (a) Representative confocal images showing apoptotic cells (TUNEL assay, positive for apoptosis cell in green) in liver tissue/tumor cells of each mouse per experimental group of both NASH (24 weeks) and NASH-HCC (24 and 28 weeks) murine models. (b) Tumor Burden was evaluated on H&E-stained slides at low magnification of each mouse per experimental group of both the 24 and 28 weeks NASH-HCC murine models.

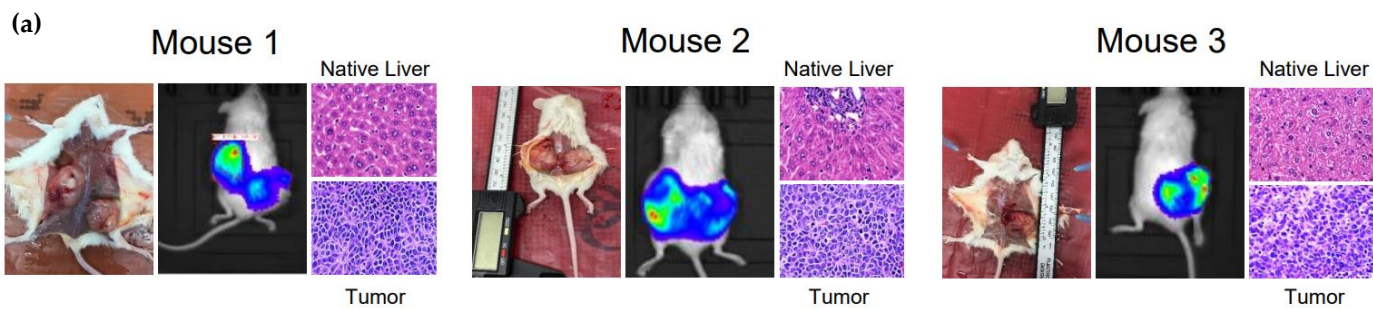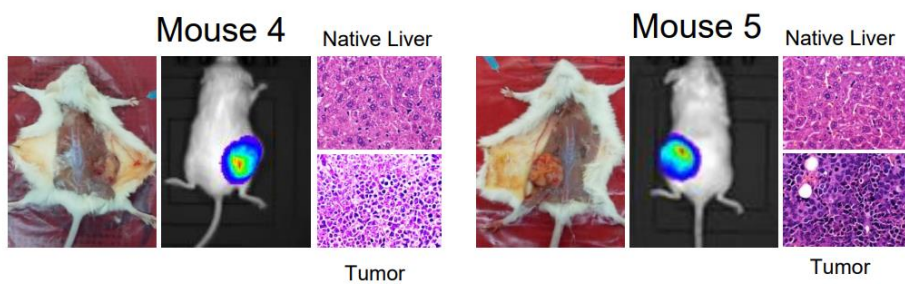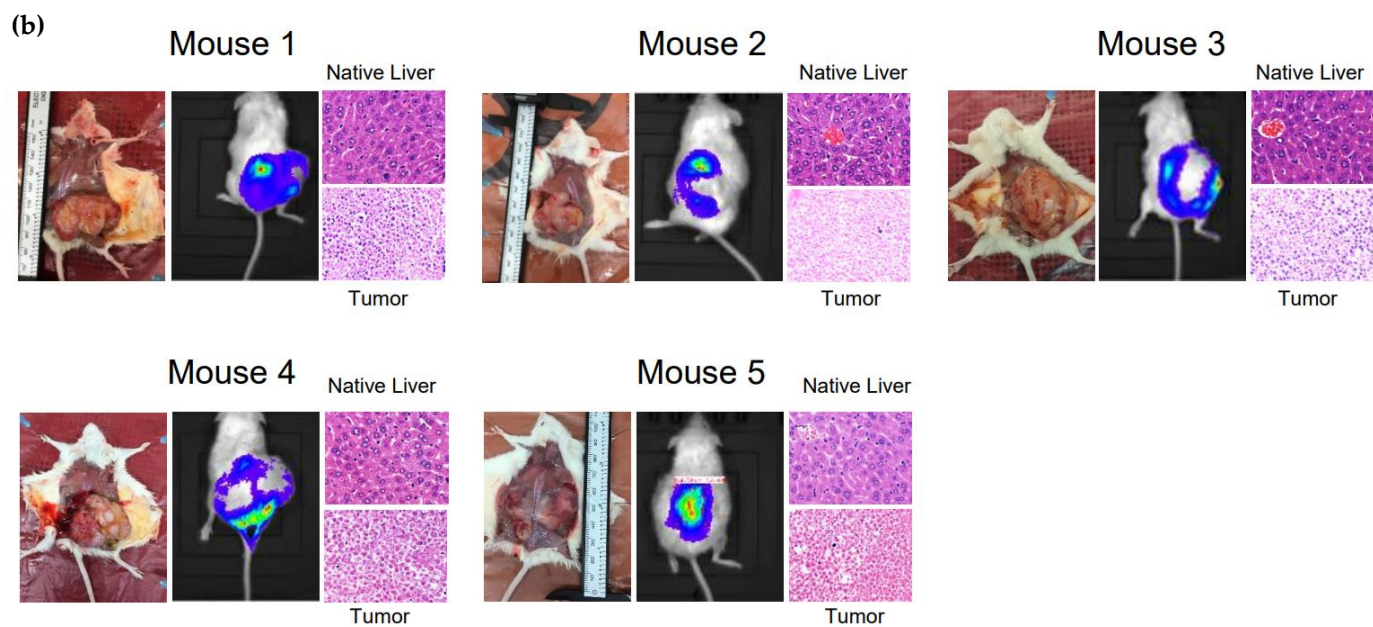

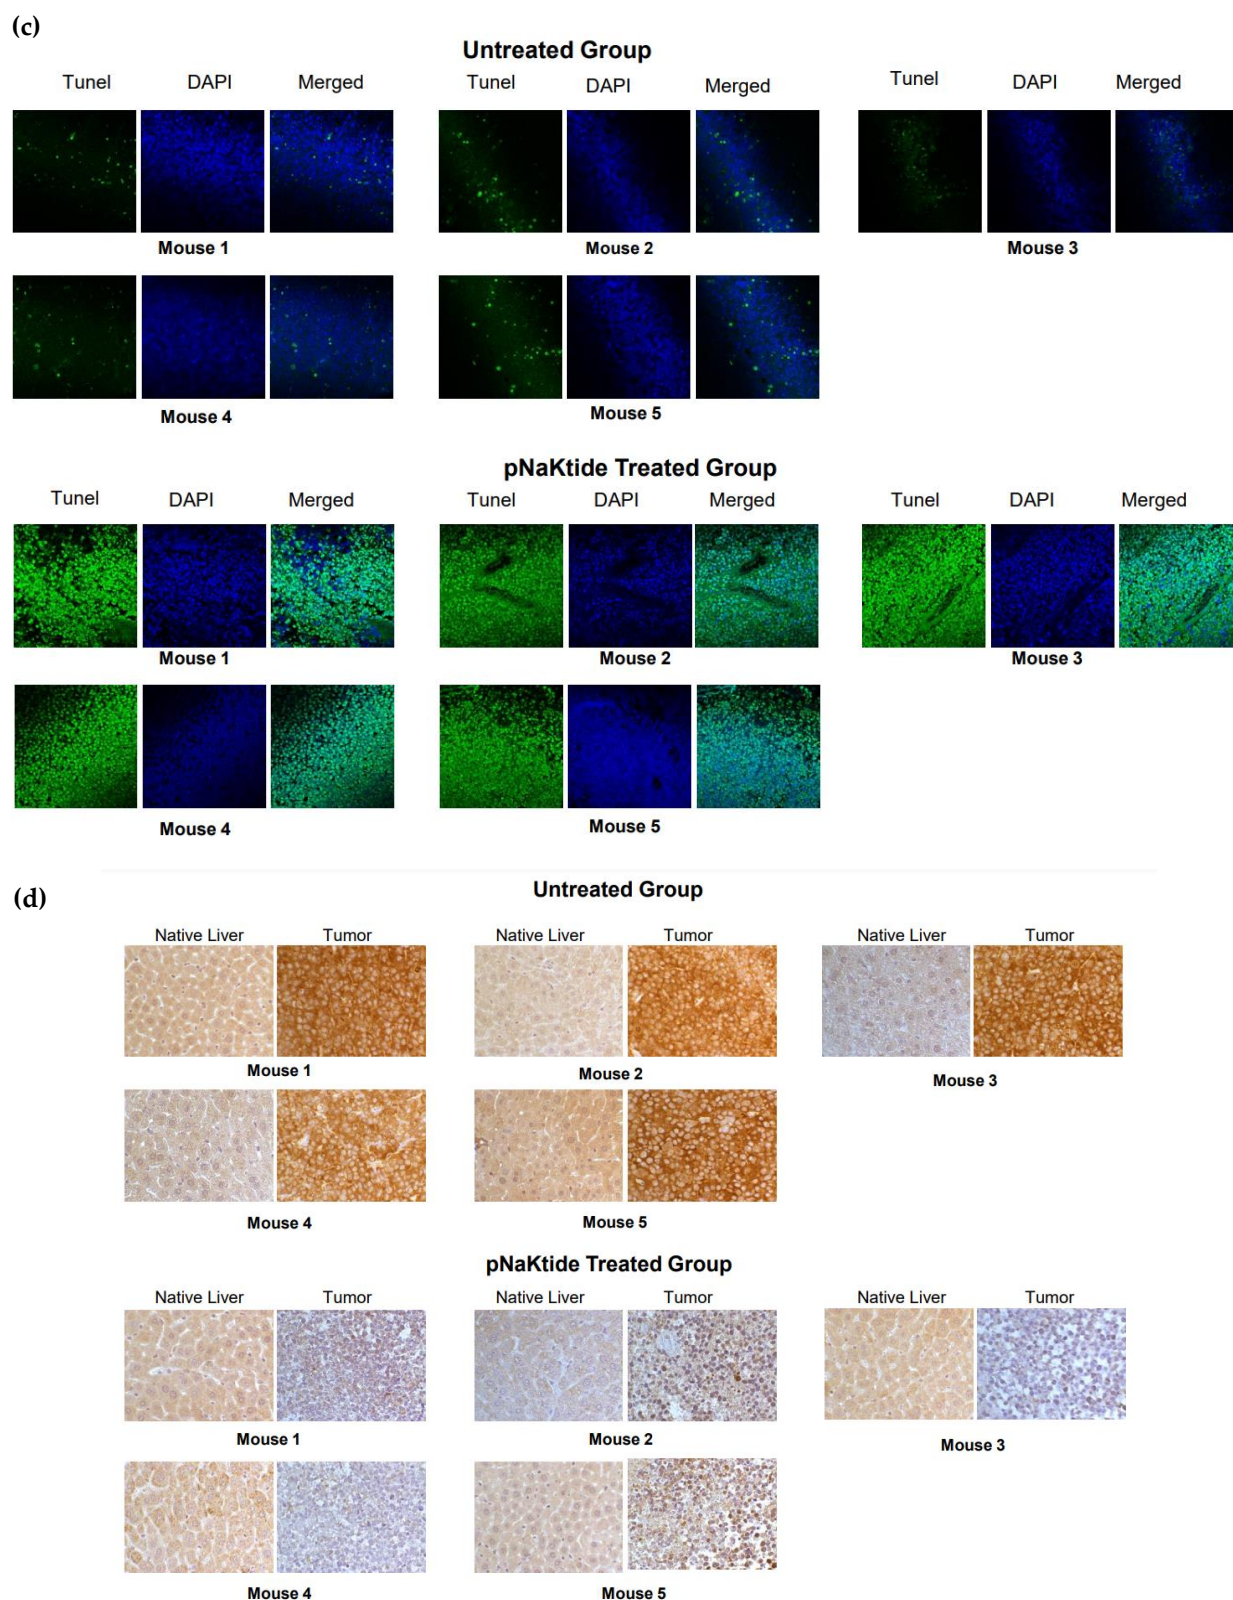

**Figure S4.** HCC analysis, apoptosis and Survivin expression in SCID MICE xenograft tumors. (a) Representative images of xenograft tumors, IVIS—videoed luminescence of tumors and H&E-stained microscopy images of liver and tumor sections for each of the mouse in the untreated group. (b) Representative images of xenograft tumors, IVIS—videoed luminescence of tumors and H&E-stained microscopy images of liver and tumor sections for each of the mouse in the pNaKtide group. (c) Representative confocal images showing apoptotic cells (TUNEL assay, positive for apoptosis cell in green, nuclei in blue; DAPI) in xenograft tumor cells of each mouse in the untreated and pNaKtide treated groups. (d) Representative images of survivin expression in liver tissues and xenograft tumor cells from each mouse in the untreated and pNaKtide treated groups.

**NMC (Mouse 1-5) (24weeks)**

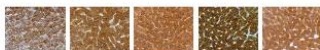

**NASH in Mouse (24 weeks)**

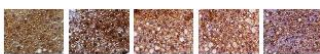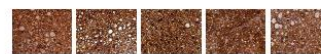

**HFD + Exercise (Mouse 1-5)**

**NASH-HCC in Mouse (24 weeks)**

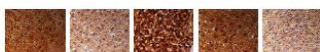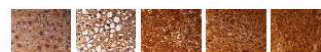

**HFD + High pNaKtide (Mouse 1-5)**

**NASH-HCC in Mouse (28 weeks)**

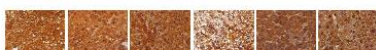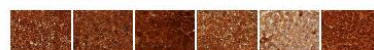

**HFD + High pNaKtide (Mouse 1-6)**

**NMC (Mouse 1-5) (24weeks)**

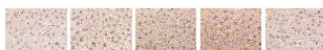

**NASH in Mouse (24 weeks)**

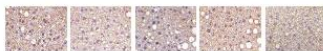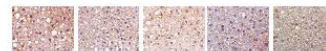

**HFD + Exercise (Mouse 1-5)**

**NASH-HCC in Mouse (24 weeks)**

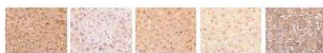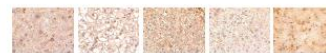

**HFD + High pNaKtide (Mouse 1-5)**

**NASH-HCC in Mouse (28 weeks)**

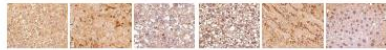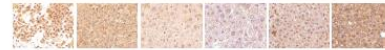

**HFD + High pNaKtide (Mouse 1-6)**

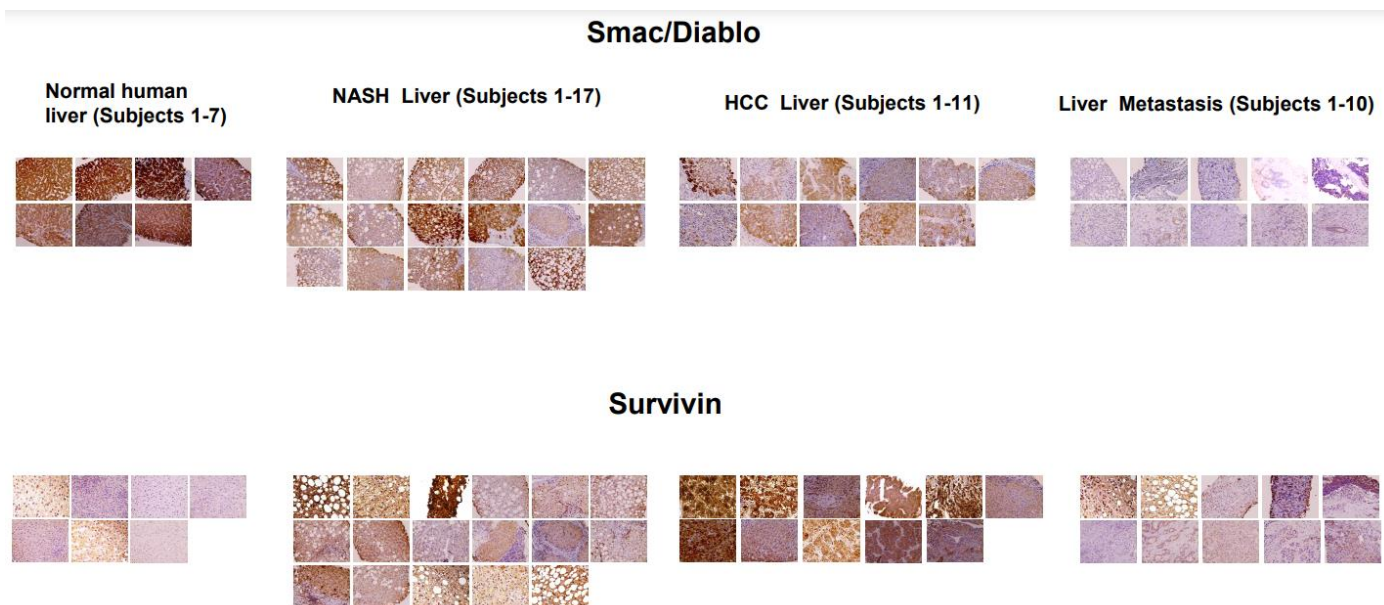

**Figure S5.** Protein expression by confocal immunostaining of both NASH (24 weeks) and NASH-HCC (24 and 28 weeks) murine models and human subjects. (a). Representative images of Smac immunostaining on liver tissues/tumor cells from each animal used for quantitation of Smac per experimental group (b) Representative images of survivin immunostaining on liver tissues/tumor cells from each mouse used for quantitation of survivin per experimental group. (c) Representative images of SMAC/Diablo and survivin immunostaining on human liver tissues from individual patients with the diagnosis of NASH, HCC, liver secondary malignancies (metastases) and normal subjects included for quantitation.

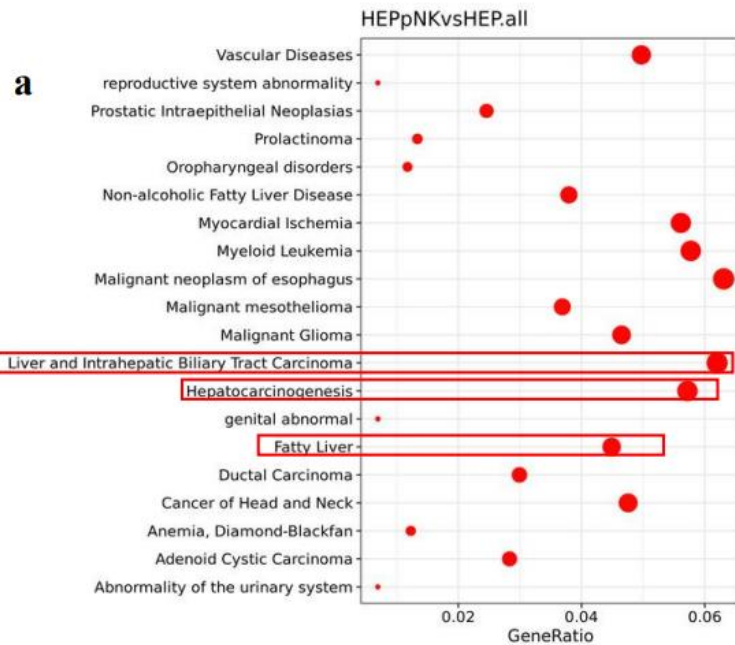

**b**

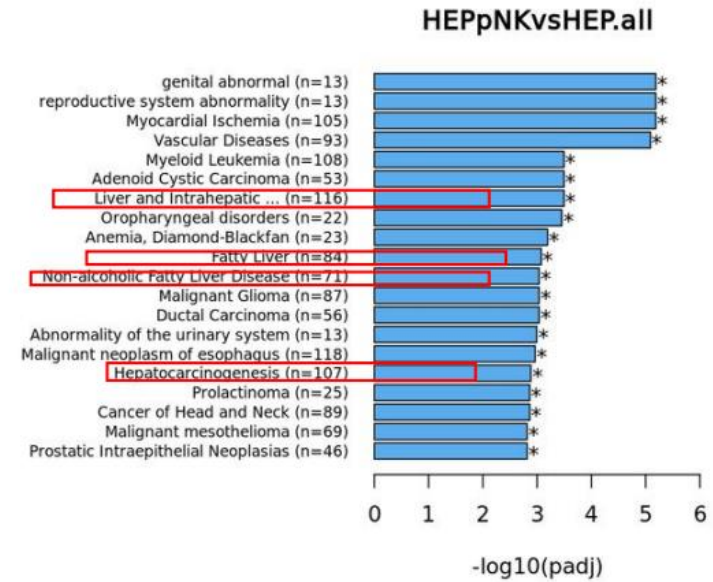

**c**

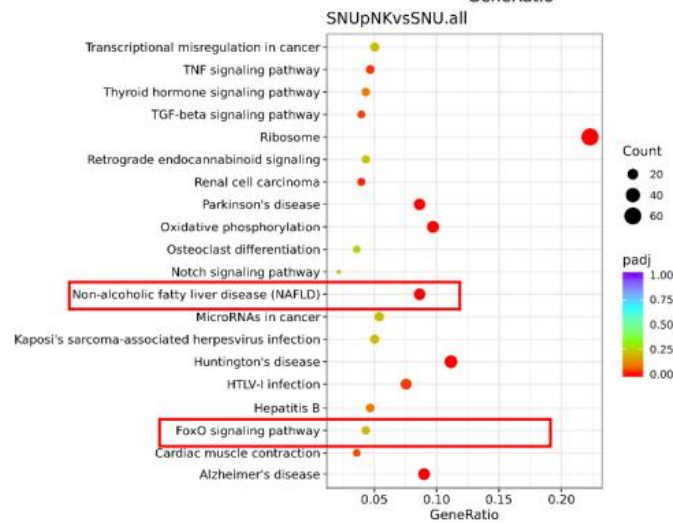

**d**

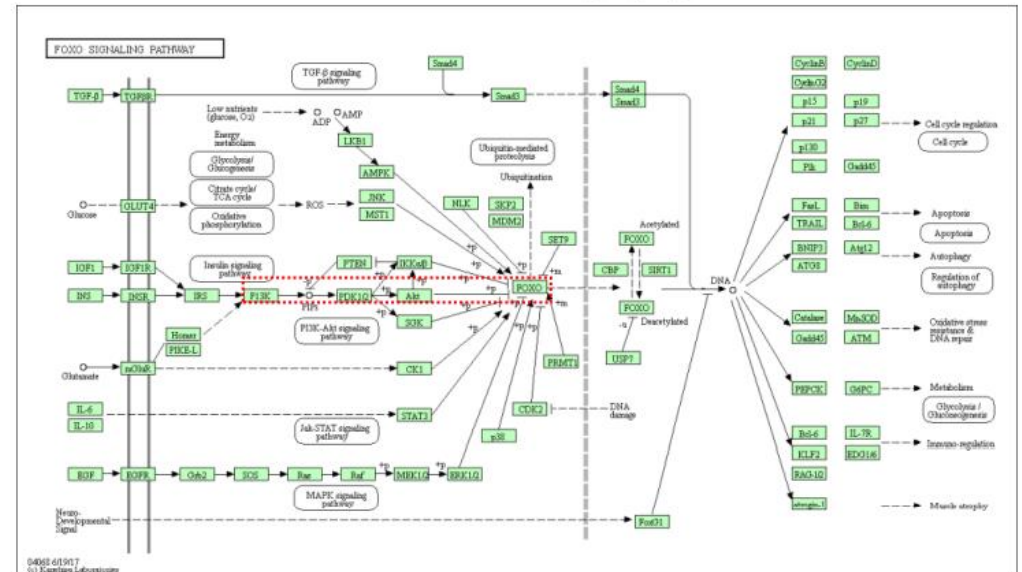

**Figure S6.** Extended RNA sequencing analysis data from Human HCC cell lines. (a,b) Dots plots and bars showing liver and related diseases pathways that are activated in HCC cell lines and ameliorated via  $\alpha$ 1-NKA Signalosome normalization by pNaKtide. (c) Dots plots showing the enrichment of FOXO signaling pathway. (d) RNA sequencing KEGG diagram showing the enrichment of the FOXO signaling pathway.

# Experimental Design

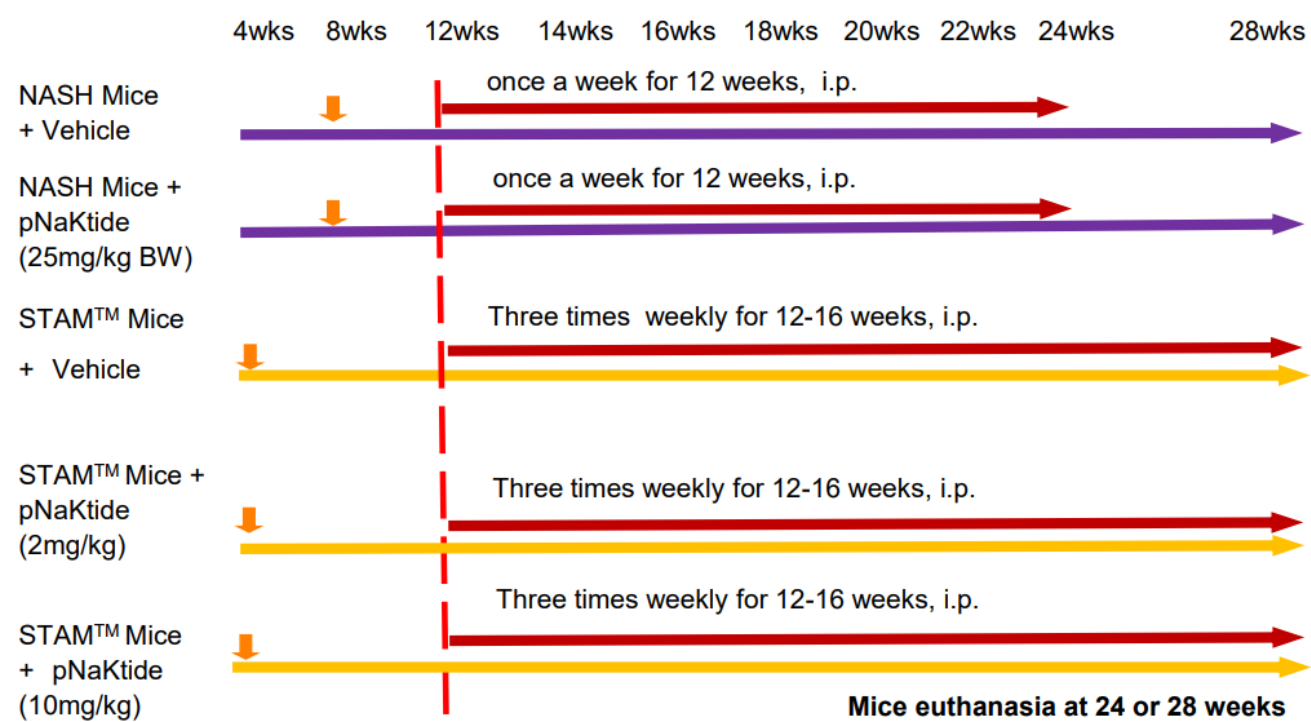

HFD=High fat diet; i.p.= Intraperitoneal injection, n=5-6mice/group

**Figure S7.** Chart showing the experimental design for NASH and NASH-HCC mouse model. The chart displays the timeline and interventions for the NASH and NASH-HCC mouse model experiments. The pNaKtide treated group in the NASH experiment received a single dose of pNaKtide (25mg/kg BW, i.p.) while the mice in the NASH-HCC model received varying doses pNaKtide (2mg/kg BW, low dose, i.p) or (10mg/kg BW, high dose, i.p), thrice every week. All mice were placed on HFD ad libitum throughout the experimental period that lasted 24 weeks for the NASH experiment and early-stage HCC arm (12 weeks of treatment), or 28 weeks for the late-stage NASH-HCC experiment (16 weeks of treatment).

**Table S1.** Key reagents and chemical used in this study. Antibodies against the indicated protein as well as other reagents/chemicals used in this study are as listed below. Their catalogue number, source and the dilutions used in the experiments are as listed.

| ANTIBODY/REAGENT/CHEMICAL                                | Source                                    | Reference      | Description          | Host Sp. | IHC   | ICC   | WB     |
|----------------------------------------------------------|-------------------------------------------|----------------|----------------------|----------|-------|-------|--------|
| Phospho-Src                                              | ThermoFisher Scientific                   | Catt 44- 660G  | Polyclonal           | Rabbit   | N/A   | 1:100 | 1:1000 |
| c-Src                                                    | Santa Cruz Biotechnology                  | Catt Sc-8056   | Monoclonal           | Mouse    | N/A   | N/A   | 1:1000 |
| Smac/Diablo                                              | Abcam                                     | Catt ab8115    | Polyclonal           | Rabbit   | 1:200 | 1:100 | 1:1000 |
| Rabbit specific HRP/DAB Detection IHC kit- Micro-polymer | Abcam                                     | Catt ab236469  | Micro-Polymer        | Goat     | N/A   | N/A   | N/A    |
| Survivin                                                 | abcam                                     | Catt ab469     | Polyclonal           | Rabbit   | 1:500 | 1:250 | 1:1000 |
| Goat Anti-Rabbit IgG H&L (Alexa Fluor® 594)              | Abcam                                     | Catt ab150080  | Polyclonal Secondary | Goat     | 1:500 | 1:750 | N/A    |
| Goat Anti-Rabbit IgG H&L (Alexa Fluor® 488), preabsorbed | Abcam                                     | Catt ab150081  | Polyclonal Secondary | Goat     | N/A   | 1:750 | N/A    |
| alpha 1 Na/K-ATPase                                      | Millipore                                 | Catt 05-369    | Monoclonal primary   | Mouse    | N/A   | 1:100 | N/A    |
| alpha tubulin                                            | Sigma-Aldrich                             | Catt T5168     | Monoclonal primary   | Mouse    | N/A   | 1:100 | 1:5000 |
| Mouse monoclonal antibody anti Na/K-ATPase (α6f)         | Developmental Studies- University of Iowa | N/A            | Monoclonal primary   | Mouse    | N/A   | N/A   | 1:1000 |
| Rabbit monoclonal anti phospho ERK1/2(MAPK) antibody     | Cell Signaling Technologies               | Catt 9154      | Monoclonal primary   | Rabbit   | N/A   | N/A   | 1:1000 |
| Mouse Monoclonal β- Catenin antibody                     | BD Biosciences                            | Catt BDB610154 | Monoclonal primary   | Mouse    | N/A   | N/A   | 1:1000 |

| ANTIBODY/REAGENT/CHEMICAL                                               | Source                      | Reference        | Description                      | Host Sp. | IHC | ICC   | WB     |
|-------------------------------------------------------------------------|-----------------------------|------------------|----------------------------------|----------|-----|-------|--------|
| Rabbit monoclonal anti ERK1/2(MAPK) antibody                            | Cell Signaling Technologies | Catt . 4694      | Monoclonal primary               | Rabbit   | N/A | N/A   | 1:1000 |
| Rabbit monoclonal anti phosphoAkt (Ser 473/Thr 308) antibody            | Cell Signaling Technologies | Catt 9271/13038S | polyclonal/Monoclonal antibodies | Rabbit   | N/A | N/A   | 1:1000 |
| Rabbit monoclonal anti-Akt antibody                                     | Cell Signaling Technologies | Catt 9272        | Monoclonal primary               | Rabbit   | N/A | N/A   | 1:1000 |
| Rabbit monoclonal phospho p70S6Kinase antibody                          | Cell Signaling Technologies | Catt 9234        | Monoclonal primary               | Rabbit   | N/A | N/A   | 1:1000 |
| Rabbit monoclonal p70S6 Kinase antibody                                 | Cell Signaling Technologies | Catt 2708        | Monoclonal primary               | Rabbit   | N/A | N/A   | 1:1000 |
| Rabbit monoclonal anti-Caveolin-1 antibody                              | Cell Signaling Technologies | Catt 3267        | Monoclonal primary               | Rabbit   | N/A | N/A   | 1:1000 |
| Digoxin                                                                 | Sigma-Aldrich               | Catt 20830-75-5  | N/A                              | N/A      | N/A | N/A   | N/A    |
| PP2                                                                     | Sigma-Aldrich               | Catt 172889-27-9 | N/A                              | N/A      | N/A | N/A   | N/A    |
| Wortmannin                                                              | Selleckchem.com             | Catt.S2758       | N/A                              | N/A      | N/A | N/A   | N/A    |
| AG 490                                                                  | Tocris Bioscience           | Catt 0414        | N/A                              | N/A      | N/A | N/A   | N/A    |
| Goat anti-Mouse IgG1 Cross-Adsorbed Secondary Antibody, Alexa Fluor 488 | ThermoFisher Scientific     | Catt A-21121     | Polyclonal Secondary             | Goat     | N/A | 1:100 | N/A    |
| FoxO1 (C29H4) Rabbit mAb                                                | Cell Signaling Technologies | Catt2880S        | Monoclonal primary               | Rabbit   | N/A | 1:100 | 1:500  |
| Anti-rabbit IgG (H+L), F(ab')2 Fragment (Alexa Fluor® 488 Conjugate)    | Cell Signaling Technologies | Catt 4412        | Polyclonal Secondary             | Goat     | N/A | 1:500 | N/A    |
| Anti-FOXO3A IgG (phospho S253)                                          | Abcam                       | Catt ab47285     | Polyclonal primary               | Rabbit   | N/A | 1:100 | 1:500  |
| FoxO3a (75D8) Rabbit mAb                                                | Cell Signaling              | Catt 2497S       | Monoclonal primary               | Rabbit   | N/A | 1:100 | N/A    |
| Anti-Lamin B1 antibody                                                  | Abcam                       | Catt ab16048     | Polyclonal primary               | Rabbit   | N/A | N/A   | 1:5000 |
| Rabbit IgG HRP-conjugated Antibody                                      | R&D systems                 | Catt HAF008      | Polyclonal Secondary             | Goat     | N/A | N/A   | 1:2000 |
